1 **TITLE**

2 Twins in Guinea-Bissau have a ‘thin-fat’ body composition compared to singletons

3

4 **AUTHORS**

5 Rucha Wagh<sup>1</sup>, Morten Bjerregaard-Andersen<sup>2,3,4,5</sup>, Souvik Bandyopadhyay<sup>6</sup>, Pranav Yajnik<sup>7</sup>,

6 Rashmi B Prasad<sup>8</sup>, Suhas Otiv<sup>1</sup>, Stine Byberg<sup>2,9</sup>, Ditte Egegaard Hennild<sup>2</sup>, Gabriel Marciano

7 Gomes<sup>2</sup>, Kaare Christensen<sup>10,11,12</sup>, Morten Sodemann<sup>2,13</sup>, Dorte Møller Jensen<sup>4,14,15</sup>,

8 Chittaranjan Yajnik<sup>1</sup>

9

10 **AFFILIATIONS**

11 <sup>1</sup>Diabetes Unit, King Edward Memorial Hospital and Research Centre, Rasta Peth, Pune,

12 Maharashtra, 411 011, India.

13 <sup>2</sup>Bandim Health Project, INDEPTH Network, Apartado 861, 1004 Bissau Codex, Guinea-

14 Bissau

15 <sup>3</sup>Department of Endocrinology, Hospital of Southwest Jutland, Haraldsgade 7, 6700 Esbjerg,

16 Denmark

17 <sup>4</sup>Steno Diabetes Center Odense, Odense University Hospital, Denmark

18 <sup>5</sup>Department of Regional Health Research, University of Southern Denmark, Odense,

19 Denmark

20 <sup>6</sup>Strategic Consultant, Cytel, Inc., India.

21 <sup>7</sup>Cytel, Inc., 675 Massachusetts Ave., Cambridge, MA 02139, USA

22 <sup>8</sup>Lund University Diabetes Centre, Department of Clinical Sciences Malmö, Lund University,

23 Jan Waldenströms gata 35, SE 20502, Malmö, Sweden

24 <sup>9</sup>Steno Diabetes Center Copenhagen, Niels Steensens vej 2-4, 2820 Gentofte, Denmark

25 <sup>10</sup>The Danish Twin Registry, Epidemiology, Institute of Public Health, University of Southern

26 Denmark, J.B. Winsløvsvej 9, 5000 Odense C, Denmark

27 <sup>11</sup>Department of Clinical Genetics, Odense University Hospital, Sdr. Boulevard 29, 5000

28 Odense C, Denmark

29 <sup>12</sup>Department of Clinical Biochemistry and Pharmacology, Odense University Hospital, Sdr.

30 Boulevard 29, 5000 Odense C, Denmark

31 <sup>13</sup>Department of Infectious Diseases, Odense University Hospital, Sdr. Boulevard 29, 5000

32 Odense C, Denmark

33 <sup>14</sup>Department of Gynaecology and Obstetrics, Odense University Hospital, Sdr. Boulevard 29,

34 5000 Odense C, Denmark

35 <sup>15</sup>Department of Clinical Research, Faculty of Health Sciences, University of Southern

36 Denmark

37

38 **CORRESPONDING AUTHORS**

39

40 Morten Bjerregaard-Andersen, Department of Endocrinology, Hospital of Southwest Jutland,

41 Haraldsgade 7, 6700, Esbjerg, Denmark

42 E-mail: [Morten.Bjerregaard-Andersen2@rsyd.dk](mailto:Morten.Bjerregaard-Andersen2@rsyd.dk)

43

44 Chittaranjan Yajnik, Diabetes Unit, KEM Hospital Research Centre, Pune, India

45 E-mail: [csyajnik@gmail.com](mailto:csyajnik@gmail.com)

46 **ABSTRACT**

47 ‘Thrifty phenotype’ hypothesis proposed that fetal undernutrition increases risk of diabetes in  
48 later life. Undernourished low birthweight Indian babies are paradoxically more adipose  
49 compared to well-nourished European babies, and are at higher risk of diabetes in later life.  
50 Twin pregnancies are an example of *in utero* growth restrictive environment due to shared  
51 maternal nutrition. There are few studies of body composition in twins. We performed  
52 secondary analysis of anthropometric body composition of twins and singletons in Guinea-  
53 Bissau, an economically deprived African country.

54 Anthropometric data was available on 7–34 year-old twins (n=209, 97 males) and singletons  
55 (n=182, 86 males) in the Guinea-Bissau Twin Registry at the Bandim Health Project. Twins  
56 had lower birth weight (2420 vs 3100 g,  $p<0.001$ ); and at follow-up, lower height (HAZ mean  
57 Z-score difference, -0.21,  $p=0.055$ ), weight (WAZ -0.73,  $p=0.024$ ) and BMI (BAZ -0.22,  
58  $p=0.079$ ) compared to singletons but higher adiposity (skinfolds: +0.33 SD,  $p=0.001$ ). Twins  
59 also had higher fasting (+0.38 SD,  $p<0.001$ ) and 2-hr OGTT glucose concentrations (+0.29  
60 SD,  $p<0.05$ ). Linear mixed-effect model accounting for intrapair correlations and interactions  
61 confirmed that twins were thinner but fatter across the age range. Data on maternal morbidity  
62 and prematurity were not available in this cohort.

63 African populations are known to have a muscular (less adipose) body composition.

64 Demonstration of a thin-fat phenotype in twins in a low socioeconomic African country  
65 supports the thesis that it could be a manifestation of early life undernutrition and not  
66 exclusive to Indians. This phenotype could increase risk of diabetes and related conditions.

67 **Keywords:** Twins, adiposity, thin-fat, early life undernutrition, Guinea-Bissau.

## 68 INTRODUCTION

69 The ‘thrifty phenotype’ hypothesis proposes that adult type 2 diabetes and related metabolic  
70 traits are a result of the fetus having to be thrifty in managing its nutrition during intrauterine  
71 life<sup>1</sup>. The initial report in an English study showed that prevalence of type 2 diabetes was  
72 higher in those with lower birth weight<sup>2</sup>. This association has been replicated in other  
73 populations<sup>3</sup>. While the exposures in the original thrifty phenotype referred to low birth  
74 weight alone, this has since been extended to include relative abnormalities in body  
75 proportions, body composition, and development of organs and physiological-endocrine  
76 systems<sup>4</sup>. India has a high prevalence of type 2 diabetes as well as intra-uterine  
77 undernutrition; this situation helped expand the thrifty phenotype concept. The Pune Maternal  
78 Nutrition Study showed that the short and thin (low ponderal index) Indian newborn weighing  
79 only 2.7 kg had more subcutaneous and visceral fat compared to a 3.5 kg English baby, along  
80 with higher concentrations of insulin and leptin and lower concentrations of adiponectin in  
81 cord blood<sup>5,6,7</sup>. Since these differences were already seen at birth, the ‘thin-fat’ phenotype  
82 could be at least partially ascribed to the influence of intrauterine undernutrition on body  
83 composition of the developing fetus (nutritional programming). This is possibly achieved  
84 through epigenetic mechanisms regulating fetal growth and development<sup>8</sup>. ‘Thin-fat’  
85 phenotype persists through childhood, adolescence and adult age, and is associated with an  
86 increased risk of diabetes<sup>9,10,11,12</sup>. Such a phenotype (albeit milder) is also described in South-  
87 East Asian populations<sup>13</sup> but rarely investigated in other populations.

88

89 Twins are born with lower birth weight as compared to singletons and therefore lend  
90 themselves to DOHaD research. Comparison of adult disease risk in birthweight-discordant  
91 twins, especially monozygotic (MZ), is valuable as it allows the dissection of genetic and  
92 intra-uterine epigenetic influences. The smaller of the twins (irrespective of zygosity) have a

93 higher risk of developing type 2 diabetes<sup>14</sup>. Comparison between twins and singletons also  
94 provides an opportunity to study the effects of relative intra-uterine undernutrition. Most of  
95 the studies have concentrated on lower birthweight alone, and adiposity has been under-  
96 explored in twins as compared to singletons. These studies have been done in relatively well-  
97 nourished Western populations. It has been discussed that the biology of small size is different  
98 in twins from that in singletons and the difficulties in interpretation of association of birth size  
99 with later cardiometabolic risk in twins have been highlighted<sup>15</sup>. Studying twins in low  
100 socioeconomic populations could be more informative, as twinning would compound the  
101 effects of maternal undernutrition in pregnancy with the ‘distributive’ biology of twin growth  
102 (30 percent of monozygotic and all dizygotic twins are dichorionic<sup>16</sup>). Thus, twin studies have  
103 the potential to reveal outcomes which could otherwise be missed. In Africa, there is a high  
104 natural twinning rate, including in Guinea-Bissau, a low-income country<sup>17,18</sup>. A twin registry  
105 was set up by the Bandim Health Project (BHP, [www.bandim.org](http://www.bandim.org)) in the capital city of Bissau  
106<sup>19</sup>. Follow-up of twins in this registry showed that young twins had higher plasma glucose  
107 concentrations both in fasting and in the post-glucose state compared to age-matched  
108 singletons<sup>20,21</sup>. This study measured skinfolds in addition to the routine anthropometry and  
109 provided an opportunity to compare adiposity of twins with that of singletons. We  
110 hypothesized that twins in Guinea-Bissau would be thinner but fatter compared to singletons.

## 111 **METHODS**

### 112 **Cohort description**

113 This is a secondary analysis of previously collected (2009-2012) data from one of Africa’s  
114 first twin registries set up by the Bandim Health Project (BHP) in Guinea-Bissau<sup>19</sup>. The BHP  
115 is a health and demographic surveillance site (HDSS), conducting epidemiological and health  
116 related research in the capital Bissau over the past 40 years. The results of the two main  
117 metabolic twin studies have previously been reported<sup>20,21</sup>. Briefly, twins (n=209) and

118 singleton controls (n=182), identified randomly from the HDSS register between 7-34 years  
119 of age were investigated for risk of diabetes and metabolic syndrome with a weight-adjusted  
120 oral glucose tolerance test (OGTT) (1.75 g glucose/kg body weight, maximum 75 g). The  
121 majority of measurements were done by a HemoCue Glucose 201+ apparatus (HemoCue,  
122 Ängelholm, Sweden), which uses capillary blood and then automatically converts the results  
123 to plasma values. In 7 % of the twins and 21 % of the singletons an AccuChek Active  
124 apparatus (Roche Diagnostics, Indiana, USA) was used, due to shortage of HemoCue  
125 cuvettes. Other biochemical measurements included total and HDL cholesterol, and  
126 triglycerides by standard enzymatic methods. Anthropometric measurements were performed  
127 by trained personnel. They included: height, weight, mid-upper arm circumference (MUAC),  
128 waist and hip circumferences using standard techniques; Skinfolds (Triceps, biceps,  
129 subscapular and suprailiac) were measured using a Harpenden Skinfold Caliper (Baty  
130 International, West Sussex, United Kingdom).  
131 Deliveries happened at home or in local institutions. Birthweight was available only in a  
132 limited number (n=102) who were delivered in a hospital or health institution. Other  
133 anthropometric measurements (skinfolds, length and circumferences) were not available at  
134 birth.

135

### 136 **Statistical analysis**

137 The primary analysis was to compare anthropometric measurements of height, thinness-  
138 obesity (BMI) and adiposity (skinfolds) between twins and singletons (Table 1). At the time of  
139 measurements, the age range was quite wide (7-34 years), therefore our preliminary analysis  
140 compared body size and composition based on sex specific WHO Z scores which provide data  
141 from birth to 19-years. The Nineteen-year value was used as reference to calculate Z -scores  
142 for older subjects.

143 We performed linear mixed effect model using the mean of anthropometric measurement as  
144 outcome. Exposures tested in the model included twin status (twin vs singleton), sex (males  
145 vs females), age in years, and interaction between age and sex as fixed effects. Further, two  
146 indicator variables indicating whether age is more than 8y and 16y respectively and their  
147 interaction was also included as fixed effects, to adjust for the additional effect of age at these  
148 growth points. These age indicators were selected based on biological growth transitions: 8y  
149 for pre-pubertal and 16y for late pubertal. Random intercepts for monozygotic (MZ) and  
150 dizygotic (DZ) twins were included to account for correlations between the twins.

151 Let,  $S$  identify twins (1 for all twins, even those twins that do not have their sibling, 0 for birth  
152 singletons) and  $F$  identify families. Further, assume  $M$  identifies MZ twin pairs and  $D$   
153 identifies DZ twin pairs. Let  $Y$  denote the outcome (height, BMI and skinfolds). For any given  
154 outcome, we allow MZ twin pairs to have some covariance different from DZ twin pairs,  
155 which can be achieved by assuming a random intercept model for each level of  $M$  and  $D$ .  
156 Let,  $m$  be the random intercept associated with  $M$  and  $d$  be the random intercept associated  
157 with  $D$ , the model for the  $i^{\text{th}}$  subject is given by,

$$Y_i = \beta S_i + m_i + d_i + e_i$$

158 where  $e$  is the error term independent of  $d$  and  $m$ . We assume the random effects to follow a  
159 Gaussian distribution with 0 mean and positive variance independent of each other. The main  
160 parameter of interest is  $\beta$  (the twins effect). We used R package lme4<sup>22</sup> to fit the random  
161 effect models. Further details of fitting the model are provided in supplementary material  
162 (Appendix S1). This model was used to predict the values given in the table.

163 We investigated the association of twin status (twin vs singleton) with fasting and 2-hr  
164 glucose concentrations by comparing the two groups by t-test (table 1). We further  
165 investigated if differences in age, sex, BMI and skinfolds between two groups influenced the  
166 difference (ANCOVA).

- 167 For ease of interpretation, results in tables and figures are presented using native variables.
- 168 For formal statistical analysis, we used log-transformed variables. All statistical analysis was
- 169 performed using R software (version 4.1) <sup>23</sup>.



170 **RESULTS**

171 The analysis comprised 209 twins (81 pairs and 47 individuals where only one of the twins  
172 was available) and 182 singletons (Table 1). Of the twins, 11 were MZ and 56 DZ twin pairs,  
173 and 14 pairs with no established zygosity. Birth weight was available on 102 participants (56  
174 twins and 46 singletons) who were born in health institutions, these participants were younger  
175 ( $12.8 \pm 4.8$  y vs  $18.8 \pm 6.4$  y,  $p < 0.001$ ) compared to those on whom birthweight was not  
176 available. Twins had lower birthweight compared to singletons ( $2.42 \pm 0.4$  vs  $3.10 \pm 0.5$  kg,  
177  $p < 0.001$ ).

178

179 At the time of study, both male and female twins were shorter, lighter, had lower BMI but  
180 higher skinfolds (adiposity) compared to singletons (table 1). To understand the  
181 anthropometric trajectory, we used the LME models to predict the outcomes at ages 8y, 12y,  
182 16y and 20y (table 2). These ages broadly represent pre-pubertal, early and late pubertal, and  
183 young adulthood and are shown for depicting average cohort representative. There was the  
184 expected increase in height, BMI and skinfolds with increasing age. Females were shorter,  
185 had higher BMI and skinfolds compared to males. The figures 1a-c compare the  
186 anthropometry by age in twins and singletons and show that twins were shorter, had a lower  
187 BMI and higher sum of skinfolds across the whole age range compared to singletons. Twins  
188 also had higher skinfolds for each BMI compared to the singletons (Fig. 1d).

189

190 As previously reported, fasting and 2-hr plasma glucose concentrations during OGTT were  
191 higher in the twins compared to the singletons, adjusting for the age and sex difference. The  
192 difference in fasting and 2-hr plasma glucose between twins and singletons remained  
193 significant after adjusting for BMI and skinfolds. However, adjusting for birth-weight reduced  
194 the size of the difference, suggesting that birth-weight difference in the two groups might

195 contribute to this association, though the number in this model was much lower  
196 (Supplementary table S1). There was no difference between twins and singletons in total and  
197 HDL cholesterol and triglyceride concentrations (Table 1).

198

## 199 **DISCUSSION**

200 We explored the presence of a ‘thin-fat’ body composition in twins as compared to singletons  
201 using data from the Guinea-Bissau twin registry. We found that twins were thinner and more  
202 adipose than their singleton counterparts, across the age range studied. Importantly, the thin-  
203 fat twins had higher plasma glucose concentrations compared to the singletons, implying  
204 increased future diabetes risk. This was at least partially attributable to lower birthweight of  
205 twins. These findings in a novel situation (twins in a low socio-economic African country)  
206 support the role of the intra-uterine undernutrition in influencing body composition and NCD  
207 risk, first described in Indians.

208

209 ‘Thinness’ refers to lower BMI and lean mass, and ‘adiposity’ to higher body fat  
210 measurements (skinfold thicknesses). This combination was considered a typically Indian  
211 (ethnic) characteristic. However, it has since been described in other South-East Asian  
212 populations from Singapore<sup>13</sup>. The phenotype could have a genetic basis but no specific  
213 genetic markers have been described as yet. It is thought to be predominantly related to  
214 multigenerational maternal-fetal undernutrition of both macro- and micronutrients which  
215 would have epigenetic influence on gene expression during crucial periods of intrauterine  
216 development<sup>24,25</sup>. Multigenerational undernutrition in Indians and South-East Asians is  
217 highlighted by the fact that between 1830 to 1980, these populations did not gain in height  
218 while Europeans gained ~15 cms<sup>26</sup>. The ‘thin-fat’ phenotype adds a body compositional  
219 dimension to the ‘thrifty’ phenotype described by Hales and Barker based on the association

220 of lower birthweight with higher risk of diabetes. The relative adiposity is also reflected in  
221 biochemical (hyperglycemia) and endocrine (high leptin and insulin, and low adiponectin  
222 concentrations) abnormalities in the cord blood, further expanding the scope of the phenotype  
223 <sup>27</sup>. Maternal obesity and diabetes have been shown to exaggerate the phenotype in migrant  
224 Indian populations <sup>28</sup>.

225

226 The increased risk of diabetes in the ‘thin-fat’ individuals appears multifactorial. Adiposity  
227 would influence risk factors for diabetes from early age including insulin resistance <sup>29,30</sup>.  
228 Lower muscle mass would also contribute to insulin resistance through its role in glucose  
229 disposal <sup>31</sup>. Post-mortem studies of Indians have shown smaller organs (pancreas, liver,  
230 kidneys, etc) compared to those in Europeans, highlighting a lower ‘capacity’ in relation to  
231 higher metabolic ‘load’ <sup>32</sup>. Such factors may explain failure of pancreatic beta cell insulin  
232 secretion at a young age and low BMI not only in Indians <sup>33,34</sup>, but also in the twins compared  
233 to singletons in Guinea-Bissau.

234

235 The limited data on body composition of twins in the literature is mainly from the well-  
236 nourished European populations. In one study, twins had higher abdominal obesity (waist-hip  
237 ratio), insulin resistance (HOMA and Insulin Sensitivity Index) and increased prevalence of  
238 type 2 diabetes in adult life as compared to singletons <sup>35</sup>. Another study which measured  
239 adiposity (DXA) in young and elderly MZ twins and a small number of singleton controls  
240 reported no significant difference between twins and singletons <sup>36</sup>. The increased risk of  
241 diabetes was also not observed in a large twin registry <sup>37</sup>. Thus, the strength and consistency  
242 of evidence linking lower birthweight in twins with the risk of diabetes and adiposity remains  
243 less conclusive than that in singletons from the developed countries.

244

245 Guinea-Bissau is a low-income country (Human Development Index: 0.480, Rank: 175 /189)  
246 with political instability and high prevalence of undernutrition<sup>38,39</sup>. At the same time, African  
247 populations have a more muscular body composition compared to Europeans<sup>40,41</sup>.  
248 Demonstration of a relatively adipose phenotype in twins compared to singletons provides  
249 support for intrauterine programming of adverse body composition by nutritional  
250 compromise. Our data showed that the twins had the expected lower birth weight (~700 gm  
251 lower) than in singletons and were shorter, thinner (lower BMI) but fatter (higher skinfolds) at  
252 follow-up. Thus, they were ‘thin-fat’ compared to singletons and had higher glycemia. Lower  
253 birthweight explained some of the variance of higher glycemia compared to singletons, the  
254 possible reasons for which are discussed. Animal model of multigenerational maternal  
255 undernutrition has described similar findings<sup>42</sup>. Sonographic measurements have usually  
256 stressed that growth in twins falters in the third trimester of gestation which is ascribed to  
257 fetal undernutrition but recent studies have demonstrated earlier growth faltering, especially  
258 in the abdominal circumference but with preservation of head circumference<sup>43,44</sup>. Earlier  
259 growth failure suggests that factors in addition to under-nutrition may contribute, for example  
260 hormonal and epigenetic<sup>43</sup>. Animal experiments involving fetal reduction also seem to  
261 support factors in addition to nutritional deprivation<sup>43</sup>. A post-mortem study in aborted  
262 human fetuses showed that adipose tissue is demonstrable from late first trimester, their  
263 precursors divide, differentiate and mature upto 22-23 weeks of gestation, and subsequently  
264 grow only in size (hypertrophy)<sup>45</sup>. It would be interesting to decide if the adiposity of twins is  
265 hyperplastic or hypertrophic or both. The developmental fate of the cells is mostly decided at  
266 gastrulation but currently there are no non-invasive tests to investigate these molecular-  
267 cellular mechanisms in human pregnancies.  
268

269 Strengths of our study are a unique and rarely studied West-African low socio-economic  
270 population with high rates of twinning. Data is available on a sizeable number of twins and  
271 singletons which facilitates the comparison. Measures of skinfolds were available in addition  
272 to the usually measured weight and height. The study has limitations, being an exploratory  
273 secondary analysis. A small number of MZ twin pairs and lack of zygosity information on 14  
274 pairs prevented us from using the classic approach of defining ‘heritability’ in twin studies.  
275 While it is tempting to attribute the phenotype to intra-uterine undernutrition, we are limited  
276 in our arguments that birthweight was available only in a fourth, and little information was  
277 available on factors such as socio-economic condition, shortened gestation and higher rates of  
278 perinatal infections and other maternal morbidities (e.g., HIV, tuberculosis, malaria) that may  
279 have contributed. In this population, twins have a 1.7-fold higher prematurity rate, compared  
280 to singletons<sup>18</sup>. Relative resource deprivation would be perpetuated even after birth for twins,  
281 such as sharing of lactation as well as economic burdens on the family hampering nutrition.  
282 We were not able to directly measure or control for many of these factors in this retrospective  
283 analysis. Thus, our report may be considered only hypothesis generating, and would hopefully  
284 prompt future prospective studies which will allow careful matching to test the relative  
285 contributions of all these factors to the fetal phenotype and future disease risk.  
286  
287 Our results show a robust finding that African twins in Guinea Bissau are thinner but fatter  
288 compared to singletons, in a low socio-economic environment with substantial maternal  
289 undernutrition. While the data doesn’t allow us to use conventional approaches of twin  
290 analysis (separating genetic from environmental contributions by comparing MZ and DZ  
291 twins) our results should invite larger twin registries to look at this novel possibility of fetal  
292 programming of body composition. Twin studies in malnourished populations could add to

293 the armamentarium of DOHaD researchers in the study of mechanistic aspects of fetal

294 programming.

295

296

297 **ACKNOWLEDGEMENTS**

298 The authors would like to thank all the participants in Guinea-Bissau, as well as the local field  
299 assistants and laboratory technicians from the Bandim Health Project, particularly Moises  
300 Soares Gomes, Leontina Indequé and Lita Indequé. The authors would also like to thank Lone  
301 Hansen, laboratory technician at the Department of Endocrinology, Odense University  
302 Hospital, Denmark, for assisting with the OGTT training and supply, as well as the  
303 biochemical analyses on collected samples. The authors would also like to thank prof. Peter  
304 Aaby, Prof. Christine Stabell Benn and Prof. Henning Beck-Nielsen for support during the  
305 project. Finally, the authors would like to acknowledge the late diabetes specialist Dr. Luis  
306 Carlos Joaquín, (who sadly died in 2012), for his assistance.

---

307 **FINANCIAL SUPPORT**

308 The principal investigator (MBA) received a combined grant from Forsknings-og Innovations  
309 Styrelsen, the University of Southern Denmark, and Odense University Hospital. Den Danske  
310 Forsknings Fond, Odense University Hospital, Fonden for Lægevidenskabens Fremme and  
311 Aase and Ejnar Danielsen's Foundation supported the data collection. CSY was a visiting  
312 professor to the University of Southern Denmark and Danish Diabetes Academy during this  
313 work, supported by Novo Nordisk Fonden. The funding sources had no role in the study  
314 design, data collection, data analysis or in writing of this manuscript.

315 **CONFLICTS OF INTEREST**

316 The Authors declare no conflicts of interest.

317 **ETHICAL STANDARDS**

318 The investigations were approved by the Ethical Committee in Guinea-Bissau. Consultative  
319 approval was obtained from the Central Ethical Committee in Denmark. Written consent  
320 (either signature or fingerprint) was obtained in all cases. For individuals <15 years consent  
321 was obtained from the mother or another caretaker.

322 **References**

323

- 324 1. Hales CN, Barker DJ. Type 2 (non-insulin-dependent) diabetes mellitus: the thrifty  
325 phenotype hypothesis. *Diabetologia*. 1992;35(7):595-601. doi:10.1007/BF00400248
- 326 2. Hales CN, Barker DJ, Clark PM, et al. Fetal and infant growth and impaired glucose  
327 tolerance at age 64. *BMJ*. 1991;303(6809):1019-1022. doi:10.1136/bmj.303.6809.1019
- 328 3. Whincup PH, Kaye SJ, Owen CG, et al. Birth weight and risk of type 2 diabetes: a  
329 systematic review. *JAMA*. 2008;300(24):2886-2897. doi:10.1001/jama.2008.886
- 330 4. Fall CH. Non-industrialised countries and affluence. *Br Med Bull*. 2001;60:33-50. doi:  
331 10.1093/bmb/60.1.33.
- 332 5. Yajnik CS, Fall CH, Coyaji KJ, et al. Neonatal anthropometry: the thin-fat Indian baby.  
333 The Pune Maternal Nutrition Study. *Int J Obes Relat Metab Disord*. 2003;27(2):173-180.  
334 doi:10.1038/sj.ijo.802219
- 335 6. Yajnik CS, Lubree HG, Rege SS, et al. Adiposity and hyperinsulinemia in Indians are  
336 present at birth. *J Clin Endocrinol Metab*. 2002;87(12):5575-5580. doi:10.1210/jc.2002-  
337 020434
- 338 7. Modi N, Thomas EL, Uthaya SN, Umranikar S, Bell JD, Yajnik C. Whole body  
339 magnetic resonance imaging of healthy newborn infants demonstrates increased central  
340 adiposity in Asian Indians. *Pediatr Res*. 2009;65(5):584-587.  
341 doi:10.1203/pdr.0b013e31819d98be
- 342 8. Yajnik C. The Story of the hungry Indian foetus. *NFI Bulletin*. 2019; 40(3):1-8.
- 343 9. Yajnik CS, Yudkin JS. The Y-Y paradox. *Lancet*. 2004;363(9403):163.  
344 doi:10.1016/S0140-6736(03)15269-5
- 345 10. Lakshmi S, Metcalf B, Joglekar C, Yajnik CS, Fall CH, Wilkin TJ. Differences in body  
346 composition and metabolic status between white U.K. and Asian Indian children  
347 (EarlyBird 24 and the Pune Maternal Nutrition Study). *Pediatr Obes*. 2012;7(5):347-



- 348 354. doi:10.1111/j.2047-6310.2012.00063.x
- 349 11. D'Angelo S, Yajnik CS, Kumaran K, et al. Body size and body composition: a  
350 comparison of children in India and the UK through infancy and early childhood. *J*  
351 *Epidemiol Community Health*. 2015;69(12):1147-1153. doi:10.1136/jech-2014-204998.
- 352 12. van Steijn L, Karamali NS, Kanhai HH, et al. Neonatal anthropometry: thin-fat  
353 phenotype in fourth to fifth generation South Asian neonates in Surinam. *Int J Obes*  
354 *(Lond)*. 2009;33(11):1326-1329. doi:10.1038/ijo.2009.154
- 355 13. Deurenberg-Yap M, Schmidt G, van Staveren WA, Deurenberg P. The paradox of low  
356 body mass index and high body fat percentage among Chinese, Malays and Indians in  
357 Singapore. *Int J Obes Relat Metab Disord*. 2000;24(8):1011-1017.  
358 doi:10.1038/sj.ijo.0801353
- 359 14. Poulsen P, Vaag AA, Kyvik KO, Møller Jensen D, Beck-Nielsen H. Low birth weight is  
360 associated with NIDDM in discordant monozygotic and dizygotic twin  
361 pairs. *Diabetologia*. 1997;40(4):439-446. doi:10.1007/s001250050698
- 362 15. Phillips DI, Davies MJ, Robinson JS. Fetal growth and the fetal origins hypothesis in  
363 twins--problems and perspectives. *Twin Research: the Official Journal of the*  
364 *International Society for Twin Studies*. 2001 Oct;4(5):327-331. DOI:  
365 10.1375/1369052012669. PMID: 11869484.
- 366 16. Hall JG. Twinning. *Lancet*. 2003 Aug 30;362(9385):735-43. doi: 10.1016/S0140-  
367 6736(03)14237-7. PMID: 12957099.
- 368 17. Smits J, Monden C. Twinning across the Developing World. *PLoS One*.  
369 2011;6(9):e25239. doi: 10.1371/journal.pone.0025239.
- 370 18. Bjerregaard-Andersen, M., Lund, N., Jepsen, F.S. *et al*. A prospective study of twinning  
371 and perinatal mortality in urban Guinea-Bissau. *BMC Pregnancy Childbirth*.  
372 2012; 12:140. <https://doi.org/10.1186/1471-2393-12-140>

- 373 19. Bjerregaard-Andersen M, Gomes GM, Hennild DE, et al. The Guinea-Bissau Twin  
374 Registry Update: A Platform for Studying Twin Mortality and Metabolic Disease. *Twin*  
375 *Res Hum Genet.* 2019;22(6):554-560.
- 376 20. Hennild DE, Bjerregaard-Andersen M, Joaquim LC, et al. Prevalence of impaired  
377 glucose tolerance and other types of dysglycaemia among young twins and singletons in  
378 Guinea-Bissau. *BMC endocrine disorders* 2016; 16(1): 46.
- 379 21. Bjerregaard-Andersen M, Hansen L, da Silva LI, et al. Risk of metabolic syndrome and  
380 diabetes among young twins and singletons in Guinea-Bissau. *Diabetes care* 2013;  
381 36(11): 3549-56.
- 382 22. Rabe-Hesketh S, Skrondal A, Gjessing HK. Biometrical modeling of twin and family  
383 data using standard mixed model software. *Biometrics.* 2008;64(1):280-288.  
384 doi:10.1111/j.1541-0420.2007.00803.x
- 385 23. R Core Team (2020). R: A language and environment for statistical computing. R  
386 Foundation for Statistical Computing, Vienna, Austria. URL: [https://www.R-](https://www.R-project.org/)  
387 [project.org/](https://www.R-project.org/).
- 388 24. Yajnik CS. The insulin resistance epidemic in India: fetal origins, later lifestyle, or  
389 both?. *Nutr Rev.* 2001;59(1 Pt 1):1-9. doi:10.1111/j.1753-4887.2001.tb01898.x
- 390 25. Yajnik CS, Yajnik PC. Fetal adiposity epidemic in the modern world: a thrifty phenotype  
391 aggravated by maternal obesity and diabetes. *Am J Clin Nutr.* 2020;112(1):8-10.  
392 doi:10.1093/ajcn/nqaa122
- 393 26. NCD Risk Factor Collaboration (NCD-RisC). A century of trends in adult human height.  
394 *eLife* 2016; 5: e13410
- 395 27. Yajnik, C. S., Lubree, H. G., Rege, S. S., Naik, S. S., Deshpande, J. A., Deshpande, S. S.,  
396 Joglekar, C. V., & Yudkin, J. S. (2002). Adiposity and hyperinsulinemia in Indians are  
397 present at birth. *The Journal of clinical endocrinology and metabolism*, 87(12), 5575–

- 398 5580. <https://doi.org/10.1210/jc.2002-020434>
- 399 28. Anand SS, Gupta MK, Schulze KM, et al. What accounts for ethnic differences in  
400 newborn skinfold thickness comparing South Asians and White Caucasians? Findings  
401 from the START and FAMILY Birth Cohorts. *Int J Obes (Lond)*. 2016;40(2):239-244.  
402 doi:10.1038/ijo.2015.171
- 403 29. Joglekar CV, Fall CH, Deshpande VU, et al. Newborn size, infant and childhood growth,  
404 and body composition and cardiovascular disease risk factors at the age of 6 years: the  
405 Pune Maternal Nutrition Study. *Int J Obes (Lond)*. 2007;31(10):1534-1544.  
406 doi:10.1038/sj.ijo.0803679
- 407 30. Bavdekar A, Yajnik CS, Fall CH, et al. Insulin resistance syndrome in 8-year-old Indian  
408 children: small at birth, big at 8 years, or both?. *Diabetes*. 1999;48(12):2422-2429.  
409 doi:10.2337/diabetes.48.12.2422
- 410 31. Abdul-Ghani MA, DeFronzo RA. Pathogenesis of Insulin Resistance in Skeletal Muscle.  
411 Benian GM, editor. *J Biomed Biotechnol*. 2010;2010:476279. Available from:  
412 <https://doi.org/10.1155/2010/476279>
- 413 32. Wells, J. C., Pomeroy, E., Walimbe, S. R., Popkin, B. M., & Yajnik, C. S. (2016). The  
414 Elevated Susceptibility to Diabetes in India: An Evolutionary Perspective. *Frontiers in*  
415 *public health*, 4, 145. <https://doi.org/10.3389/fpubh.2016.00145>
- 416 33. Staimez LR, Weber MB, Ranjani H, Ali MK, Echouffo-Tcheugui JB, Phillips LS, Mohan  
417 V, Narayan KM. Evidence of reduced  $\beta$ -cell function in Asian Indians with mild  
418 dysglycemia. *Diabetes Care*. 2013 Sep;36(9):2772-8. doi: 10.2337/dc12-2290.
- 419 34. Yajnik CS, Bandopadhyay S, Bhalerao A, et al. Poor In Utero Growth, and Reduced  $\beta$ -  
420 Cell Compensation and High Fasting Glucose From Childhood, Are Harbingers of  
421 Glucose Intolerance in Young Indians. *Diabetes Care*. 2021;44(12):2747-2757.  
422 doi:10.2337/dc20-3026

- 423 35. Poulsen P, Grunnet LG, Pilgaard K, et al. Increased risk of type 2 diabetes in elderly  
424 twins. *Diabetes*. 2009;58(6):1350-1355. doi:10.2337/db08-1714
- 425 36. Malis, C., Rasmussen, E. L., Poulsen, P., Petersen, I., Christensen, K., Beck-Nielsen, H.,  
426 Astrup, A., & Vaag, A. A. (2005). Total and regional fat distribution is strongly  
427 influenced by genetic factors in young and elderly twins. *Obesity research*, 13(12),  
428 2139–2145. <https://doi.org/10.1038/oby.2005.265>
- 429 37. Petersen I, Nielsen MM, Beck-Nielsen H, Christensen K. No evidence of a higher 10  
430 year period prevalence of diabetes among 77,885 twins compared with 215,264  
431 singletons from the Danish birth cohorts 1910-1989. *Diabetologia*. 2011;54(8):2016-  
432 2024. doi:10.1007/s00125-011-2128-2
- 433 38. United Nations Development Programme 2019; Human Development Indicators.
- 434 39. World Food Programme. Guinea-Bissau Country Brief; July and August 2021.
- 435 40. Wagner DR, Heyward VH. Measures of body composition in blacks and whites: a  
436 comparative review. *Am J Clin Nutr*. 2000;71(6):1392-1402. doi:10.1093/ajcn/71.6.1392
- 437 41. Silva AM, Shen W, Heo M, et al. Ethnicity-related skeletal muscle differences across the  
438 lifespan. *Am J Hum Biol*. 2010;22(1):76-82. doi:10.1002/ajhb.20956
- 439 42. Hardikar AA, Satoor SN, Karandikar MS, et al. Multigenerational Undernutrition  
440 Increases Susceptibility to Obesity and Diabetes that Is Not Reversed after Dietary  
441 Recuperation. *Cell Metab*. 2015;22(2):312-319. doi:10.1016/j.cmet.2015.06.008
- 442 43. Muhlhausler, B. S., Hancock, S. N., Bloomfield, F. H., & Harding, R. (2011). Are twins  
443 growth restricted?. *Pediatric research*, 70(2), 117–122.  
444 <https://doi.org/10.1203/PDR.0b013e31821f6cfd>
- 445 44. Hirsch L, Okby R, Freeman H, et al. Differences in fetal growth patterns between twins  
446 and singletons. *J Matern Fetal Neonatal Med*. 2020;33(15):2546-2555.  
447 doi:10.1080/14767058.2018.1555705

448 45. Poissonnet, C. M., Burdi, A. R., & Bookstein, F. L. (1983). Growth and development of  
449 human adipose tissue during early gestation. *Early human development*, 8(1), 1–11.  
450 [https://doi.org/10.1016/0378-3782\(83\)90028-2](https://doi.org/10.1016/0378-3782(83)90028-2)

451

452

453

454

455 **Table 1: Comparison of singletons and twins**

| Parameters                              | Females (N=208)   |               |                 |          | Males (N=183)     |              |                 |          |
|-----------------------------------------|-------------------|---------------|-----------------|----------|-------------------|--------------|-----------------|----------|
|                                         | Singletons (N=96) | Twins (N=112) | Mean difference | P-value* | Singletons (N=86) | Twins (N=97) | Mean difference | P-value* |
| Age (yrs)                               | 16.33(6.31)       | 17.40 (6.53)  | 0.17            | 0.234    | 15.32(7.11)       | 17.03(6.75)  | 0.27            | 0.097    |
| Birthweight (kg) <sup>§</sup>           | 3.13(0.44)        | 2.35(0.36)    | -1.40           | <0.000   | 3.06(0.35)        | 2.48(0.55)   | -1.05           | <0.000   |
| Height (Z-score) <sup>a</sup>           | -0.35(1.45)       | -0.62(0.96)   | -0.27           | 0.110    | -0.60(0.96)       | -0.74(0.88)  | -0.15           | 0.275    |
| Weight (Z-score) <sup>b</sup>           | -0.35(2.10)       | -1.33(1.16)   | -0.98           | 0.116    | -1.10(0.74)       | -1.66(0.84)  | -0.56           | 0.041    |
| BMI (Z-score) <sup>c</sup>              | -0.23(1.18)       | -0.47(1.21)   | -0.24           | 0.147    | -1.04(1.07)       | -1.24(1.21)  | -0.21           | 0.226    |
| Sum of Skinfolds (Z-score) <sup>d</sup> | -0.13(1.18)       | 0.11(1.08)    | 0.25            | 0.075    | -0.12(0.72)       | 0.11(0.92)   | 0.43            | 0.004    |
| Fasting plasma glucose (mmol/l)         | 5.08(0.69)        | 5.35(0.70)    | 0.39            | 0.005    | 5.01(1.00)        | 5.37(0.88)   | 0.37            | 0.011    |
| 2h plasma glucose (mmol/l)              | 6.38(1.19)        | 6.67(1.13)    | 0.25            | 0.074    | 6.18(1.31)        | 6.61(1.20)   | 0.33            | 0.023    |
| Total cholesterol (mg%)                 | 4.20(0.68)        | 4.33(0.78)    | 0.18            | 0.253    | 4.19(0.83)        | 3.91(0.72)   | -0.35           | 0.034    |
| HDL cholesterol (mg%)                   | 1.26(0.29)        | 1.30(0.31)    | 0.12            | 0.495    | 1.31(0.35)        | 1.26(0.31)   | -0.14           | 0.400    |
| Triglycerides (mg%)                     | 0.89(0.34)        | 0.95(0.36)    | 0.16            | 0.305    | 0.92(0.32)        | 1.02(0.73)   | 0.17            | 0.303    |

456

457 <sup>§</sup> Birth weight available on 102 participants (Females: S (24), T (26), Males: S (22), T (30)); <sup>a</sup> Z scores based on  
458 WHO height-for-age criteria; <sup>b</sup> Z scores based on WHO weight-for-age criteria; <sup>c</sup> Z scores based on WHO BMI-  
459 for-age criteria; <sup>d</sup> Standardized Z scores calculated internally using regression method; \* p-value calculated using  
460 t-test.

461 **Table 2: Predicted values (linear mixed effect model) between singletons and twins at**  
 462 **different ages.**

| Parameters                         | Females (N=208)      |                  | Males (N=183)        |                 |
|------------------------------------|----------------------|------------------|----------------------|-----------------|
|                                    | Singletons<br>(N=96) | Twins<br>(N=112) | Singletons<br>(N=86) | Twins<br>(N=97) |
| <b>At 8y</b>                       |                      |                  |                      |                 |
| Predicted height (cm)              | 122.3                | 121.3            | 120.8                | 120.6           |
| Predicted BMI (kg/m <sup>2</sup> ) | 14.6                 | 13.9             | 14.1                 | 13.6            |
| Preicted sum of Skinfold (mm)      | 17.8                 | 19.8             | 15.3                 | 18.5            |
|                                    |                      |                  |                      |                 |
| <b>At 12y</b>                      |                      |                  |                      |                 |
| Predicted height (cm)              | 145.19               | 144.19           | 145.3                | 145.0           |
| Predicted BMI (kg/m <sup>2</sup> ) | 17.5                 | 16.8             | 16.1                 | 15.5            |
| Preicted sum of Skinfold (mm)      | 26.7                 | 28.7             | 17.9                 | 20.6            |
|                                    |                      |                  |                      |                 |
| <b>At 16y</b>                      |                      |                  |                      |                 |
| Predicted height (cm)              | 149.2                | 148.2            | 147.9                | 147.7           |
| Predicted BMI (kg/m <sup>2</sup> ) | 19.4                 | 18.7             | 16.8                 | 16.2            |
| Preicted sum of Skinfold (mm)      | 32.8                 | 34.8             | 19.6                 | 22.3            |
|                                    |                      |                  |                      |                 |
| <b>At 20y</b>                      |                      |                  |                      |                 |
| Predicted height (cm)              | 158.5                | 157.5            | 170.6                | 170.3           |
| Predicted BMI (kg/m <sup>2</sup> ) | 21.3                 | 20.6             | 19.8                 | 19.3            |
| Preicted sum of Skinfold (mm)      | 33.2                 | 35.2             | 20.5                 | 23.2            |

463

464

465 **Figure 1**

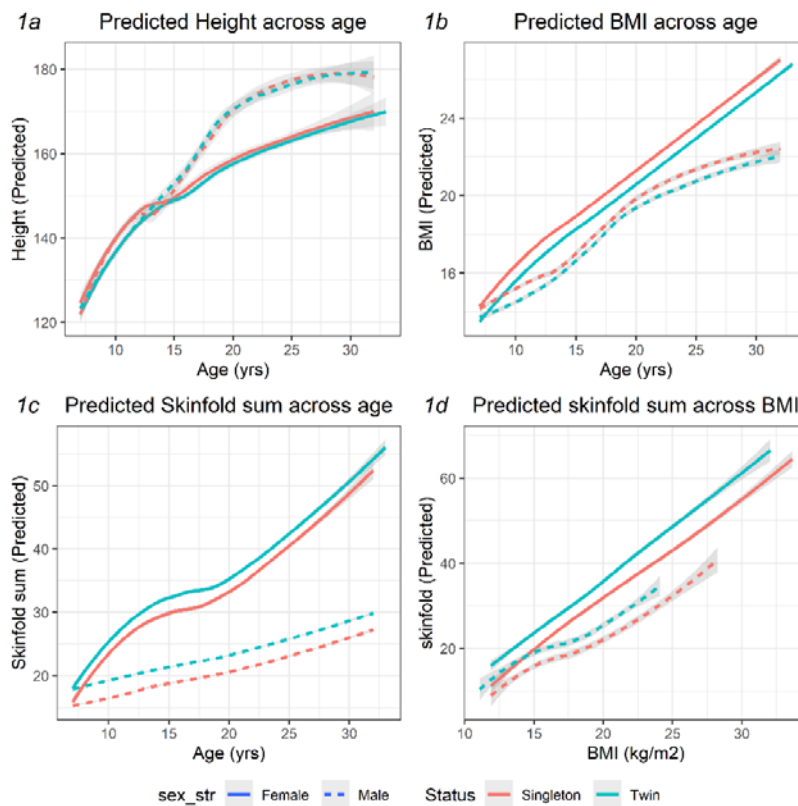

466

467 **Figure 1. Comparison of anthropometry and body composition between singletons and**

468 **twins. Solid line: Females, Dotted line: Males, Orange: Singleton, Green: Twin**

469
